# Supplementary material
Source: PubMed Central journal article supplement (PMC1474806)
Supplement: mbc_E06-02-0114_1.pdf [file mbc_E06-02-0114_1.pdf]

Supplemental Table 1. Primers for amplification of the Ce-kettin cDNA

| Product            | Primer pair                                               |
|--------------------|-----------------------------------------------------------|
| Fr-1               | GGTTTAATTACCCAAGTTTGAG (SL1)<br>GCTGACCCGTTTGCAGTTTTTGCGG |
| Fr-2               | GGAATCAAAGCAGCAAATGGTTC<br>TGAGGTTTGTGGTATATCCAGTG        |
| Fr-3               | TACCGTCAAACCCTATCTCATGG<br>GAGACAATACAAAACGATGGGCC        |
| Fr-4               | ATGGCTCGTCAATGGTCAGCCAC<br>GCATCCACTGCCTCTAGCTTCTC        |
| Fr-5               | TGCTTCCTGGAAGCGTGTTCAAG<br>TCAGCCGACTCCAGTTGAGTAAG        |
| Fr-5' <sup>a</sup> | GAAATTGAAAACCGTGAGAAGCTAG<br>GGAAGTTTGGTTTCTCCTTTTGAAC    |
| Fr-6               | AGAGCTTGAGGCTCCGAAGATCG<br>TGGAGCATCTTCACGAGCTGGTC        |
| Fr-7               | AAGACGAATTGCCGAGATTGAAG<br>GAGCATCTGGTTTTGGAGCAGCC        |
| Fr-8               | GATACTTTGGGATCTCTTGGCCC<br>GTATATTGAGACGATATGGCGAC        |

<sup>a</sup> Cloning of Fr-5 was not successful. Therefore, Fr-5' was amplified by the nested primers using Fr-5 as a template and used for cloning.

Supplemental Table 2. Tryptic fragments of the MH44 antigen

| Peptide sequence         | Residues in Ce-kettin |
|--------------------------|-----------------------|
| GKPISASNNVK              | 4196-4206             |
| GDHFTVDREK               | 3789-3798             |
| HADGYEISQSK              | 4081-4091             |
| GDHFTVDR                 | 3789-3796             |
| NEDVAEYK                 | 4103-4110             |
| GAEEGPRYEAPR             | 4029-4040             |
| LENSHAGEYTVR             | 3895-3906             |
| TGIKGDHFTVDREK           | 3785-3798             |
| AAADSPHFIK               | 4154-4164             |
| NNEPVKHADGYEISQSK        | 4075-4091             |
| TGIKGDHFTVDR             | 3785-3796             |
| IKEIQKPEQPKEEPIVHK       | 3754-3772             |
| NEDVAEYKVEASNPAGK        | 4103-4119             |
| HADGYEISQSKGEAILR        | 4081-4097             |
| NNEPVKHADGYEISQSKGEAILR  | 4075-4097             |
| ETPAVVKPVIEETR           | 3802-3815             |
| DLKETPAVVKPVIEETR        | 3799-3815             |
| TLITTTPTNSSLHIGR         | 3879-3894             |
| FTSQIQPIVVDEGK           | 4041-4054             |
| VTPDSAGEYQIVIR           | 4221-4234             |
| DGQPLPNDDRFRQVVEEGGAYK   | 3968-3988             |
| FVIEFAGAAPVK             | 3852-3863             |
| FSAEVDGNPEPTVQWQFK       | 4178-4195             |
| GAQFSAQFSGFPDPTIR        | 4055-4071             |
| LENAAGTVESLANLTVAPPTTQGK | 3907-3930             |
| FSNIISTDAGIYEIVAK        | 3991-4007             |
| FVIEFAGAAPVKVTWLK        | 3852-3868             |
